# Supplementary material for: The antitumor effect of arsenic trioxide on hepatocellular carcinoma is enhanced by andrographolide
Source: PubMed Central journal article supplement (PMC5710893; doi:10.18632/oncotarget.18677), 2017-06-27
Supplement: oncotarget-08-90905-s001.pdf [file oncotarget-08-90905-s001.pdf]

## The antitumor effect of arsenic trioxide on hepatocellular carcinoma is enhanced by andrographolide

### Supplementary Materials

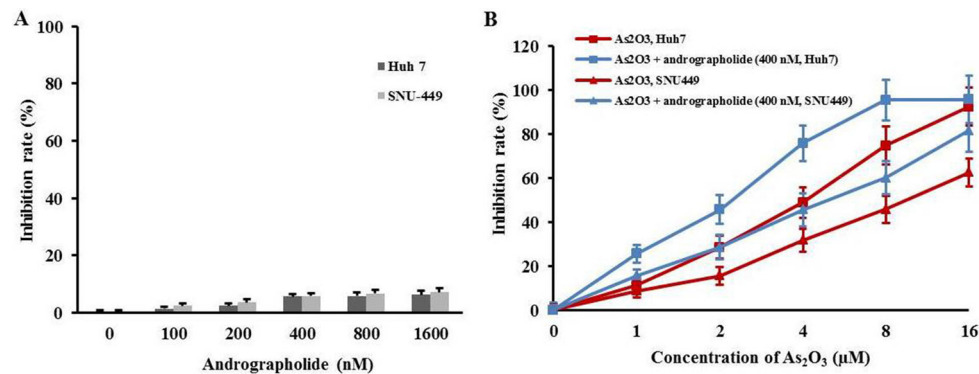

**Supplementary Figure 1: Andrographolide synergistically enhanced the anti-tumor effects of As<sub>2</sub>O<sub>3</sub> in Huh7 cells.** (A) Huh7 cells were treated with different doses of andrographolide ranging from 100 to 1600 nM for 48 h. The growth inhibition rate was measured by MTT assay. (B) The cells were treated with As<sub>2</sub>O<sub>3</sub> or As<sub>2</sub>O<sub>3</sub> plus andrographolide at the indicated time point. Each experiment was repeated independently more than three times.

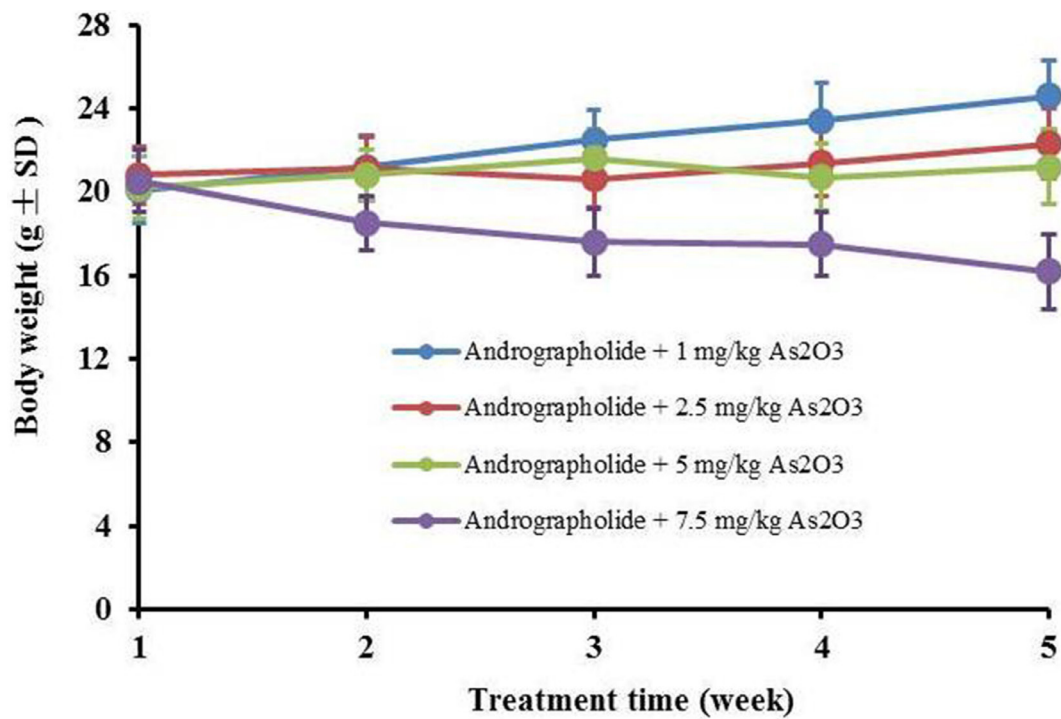

**Supplementary Figure 2: Dosage selection for the combination study in HepG2 xenografts *in vivo*.** Tumor bearing mice were treated with different combination treatments and their body weights were measured on the indicated days ( $n = 3$ ).
